# Supplementary material
Source: Springer Nature journal article supplement (https://www.springermedizin.de/resource/supplementary/12885_2005_243_MOESM3_ESM.pdf/9469362)

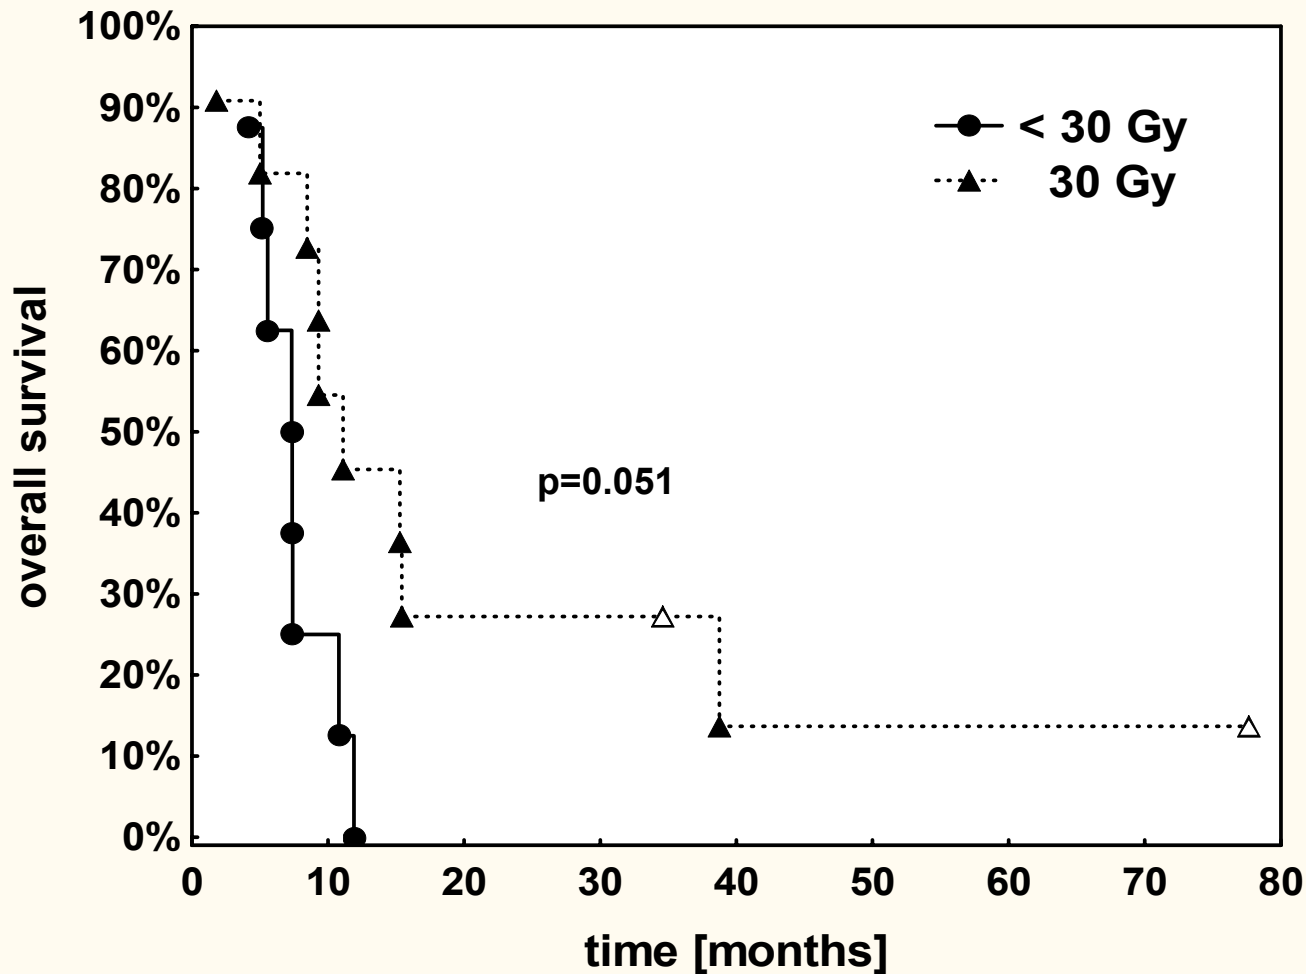

Supplement: MOESM3 [file 9469362]
